# Supplementary material for: A rhodamine-based fluorescent chemosensor for Al3+: is it possible to control the metal ion selectivity of a rhodamine-6G based chemosensor?
Source: Royal Society of Chemistry journal article supplement (doi:10.1039/c8nj01130c), 2018-01-01
Supplement: c8nj01130c1.pdf [file c8nj01130c1.pdf]

**Electronic Supplementary Information**

**Rhodamine based fluorescent chemosensor for Al<sup>3+</sup>: Is it possible to control metal ion selectivity of rhodamine-6G based chemosensor?**

Ankita Roy,<sup>a</sup> Rajat Mukherjee,<sup>a</sup> Bomba Dam<sup>b</sup>, Somasri Dam<sup>c</sup> and Partha Roy<sup>\*a</sup>

<sup>a</sup> Department of Chemistry, Jadavpur University, Jadavpur, Kolkata-700 032, India.

<sup>b</sup> Microbiology Laboratory, Department of Botany (DST-FIST & UGC-DRS Funded), Institute of Science, Visva-Bharati (A Central University), Santiniketan, West Bengal 731235, India

<sup>c</sup> Department of Microbiology, The University of Burdwan, Burdwan, West Bengal 713104, India

E-mail: [proy@chemistry.jdvu.ac.in](mailto:proy@chemistry.jdvu.ac.in); Tel: +91-33-2457-2374; Fax: +91-33-2414-6414.

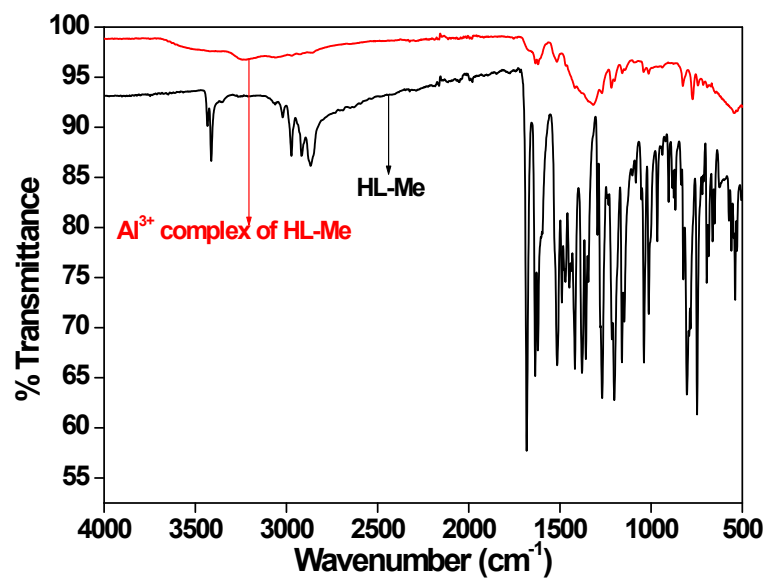

**Fig. s1:** FT-IR spectra of HL-Me and its Al<sup>3+</sup> complex

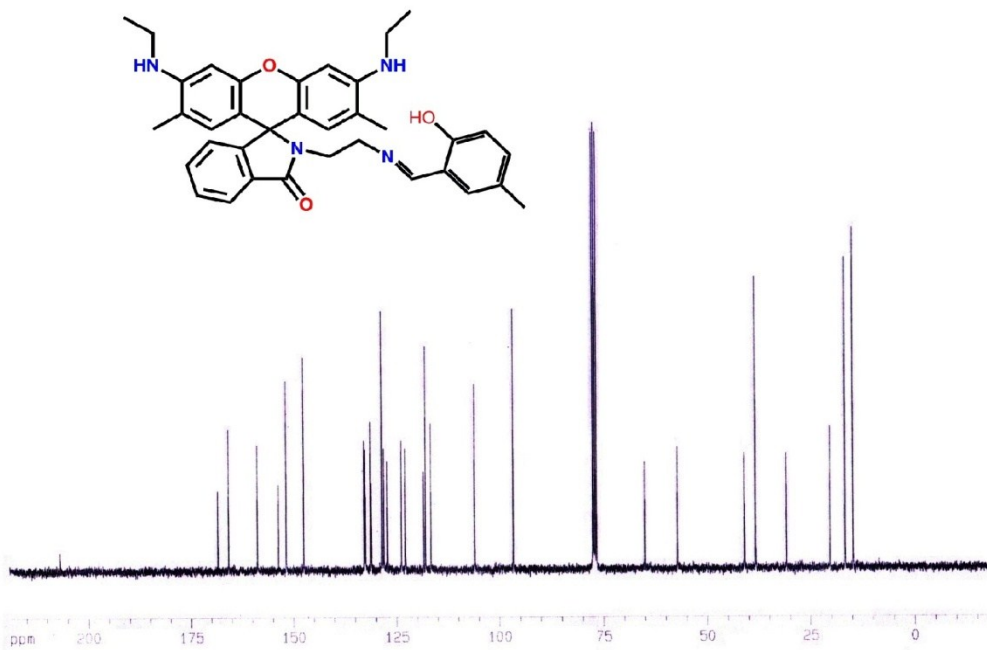

**Fig. s2:** <sup>13</sup>C NMR Spectrum of HL-Me in CDCl<sub>3</sub>

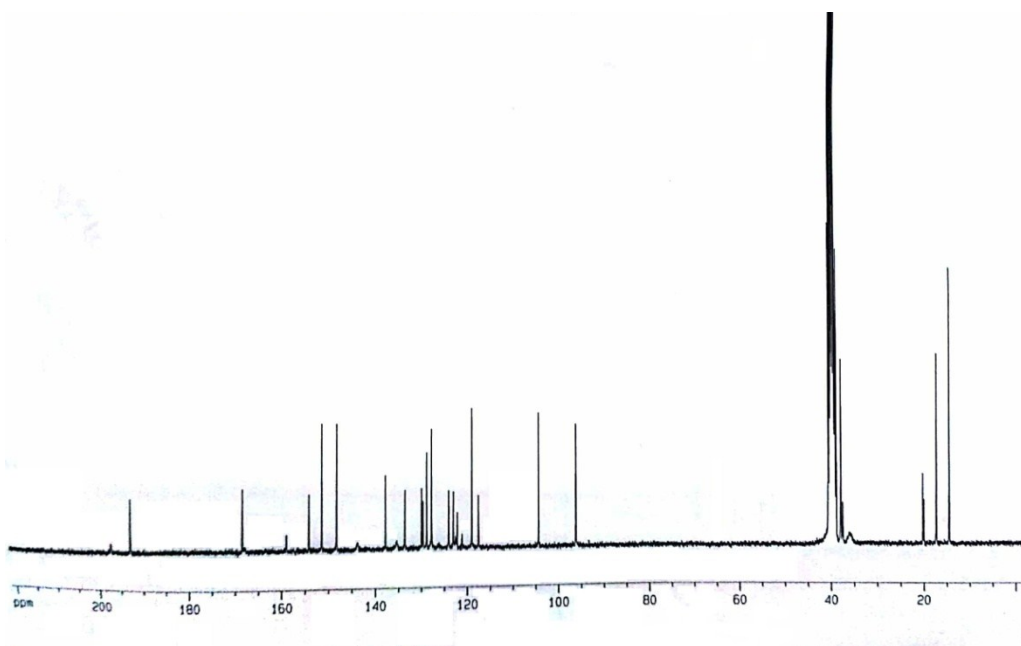

**Fig. s3:**  $^{13}\text{C}$  NMR Spectrum of HL-Me in the presence of  $\text{Al}^{3+}$  ion in  $\text{DMSO-d}_6$

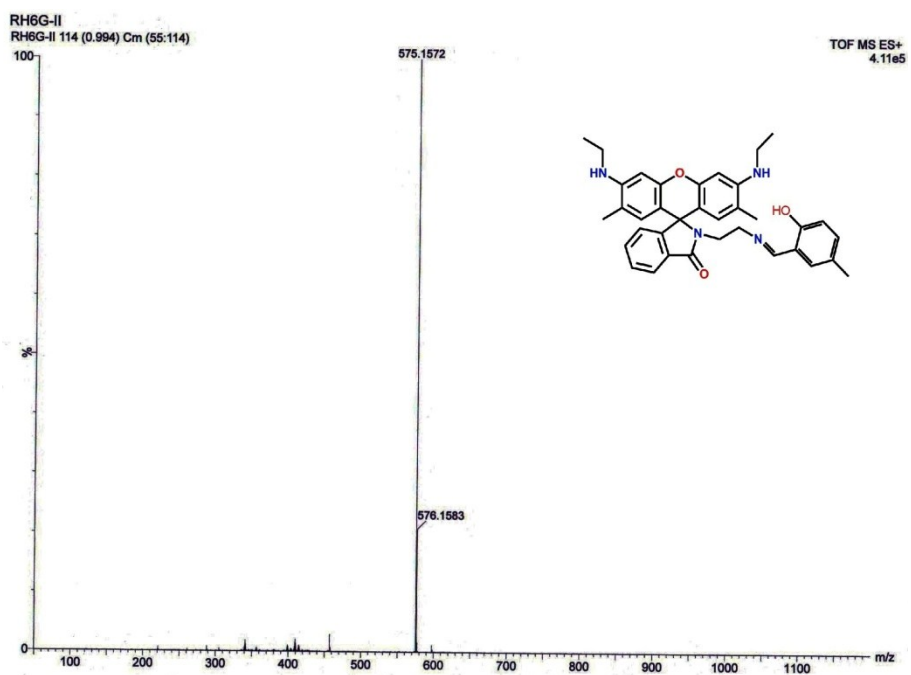

**Fig. s4:** Mass spectrum of HL-Me in methanol

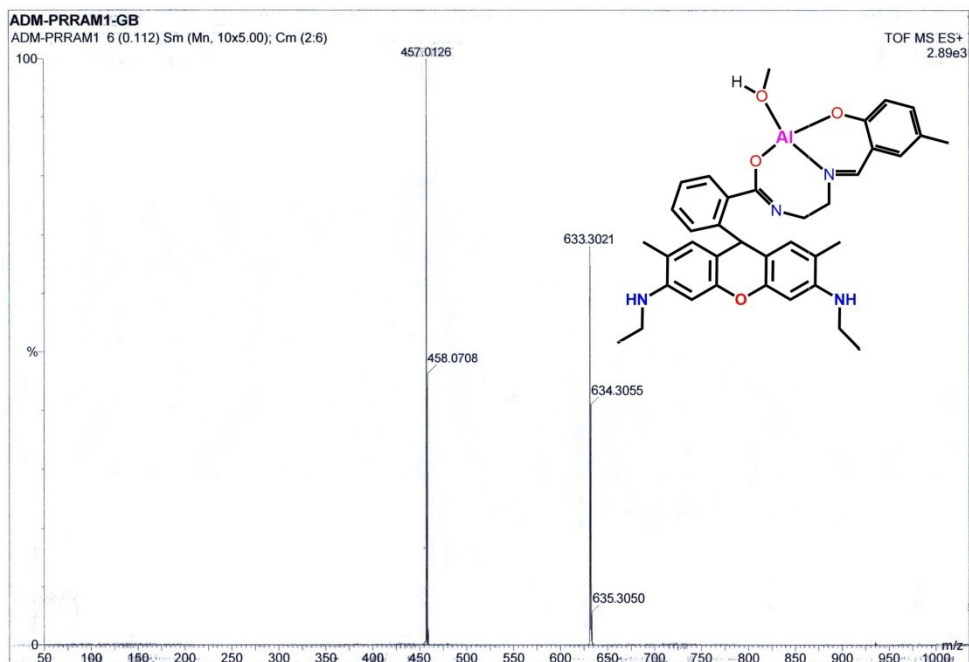

**Fig. s5:** Mass spectrum of HL-Me with  $\text{Al}^{3+}$  i.e. Al-(L-Me) complex in methanol

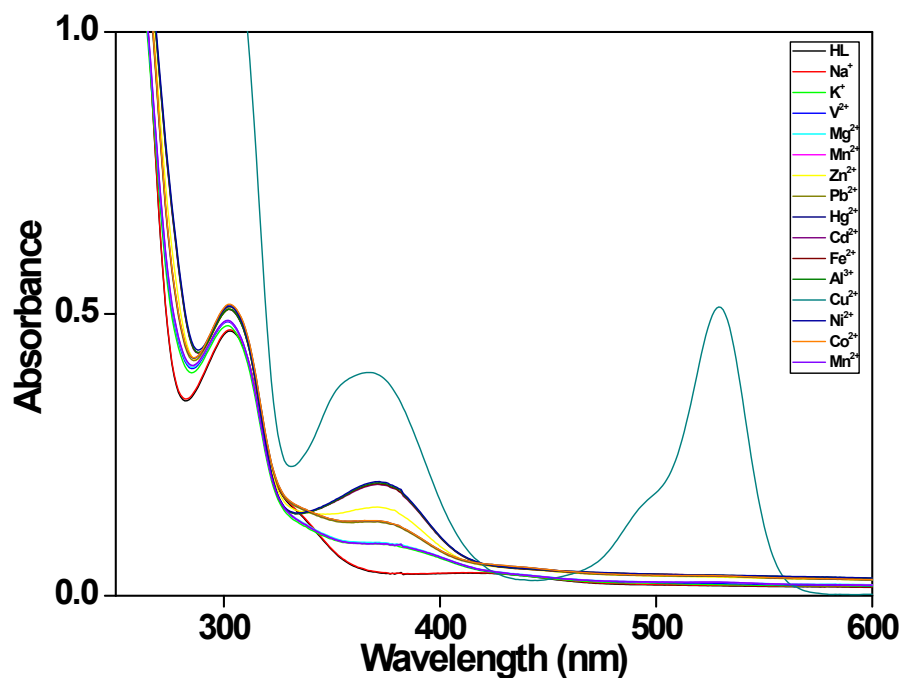

**Fig. s6:** Absorption spectra of HL-Me ( $40 \mu\text{M}$ ) upon addition of in the presence of one equivalent of different metal ions in 10 mM HEPES buffer at pH 7.4 in  $\text{H}_2\text{O}/\text{MeOH} = 1:9$  (v/v) at  $25^\circ\text{C}$

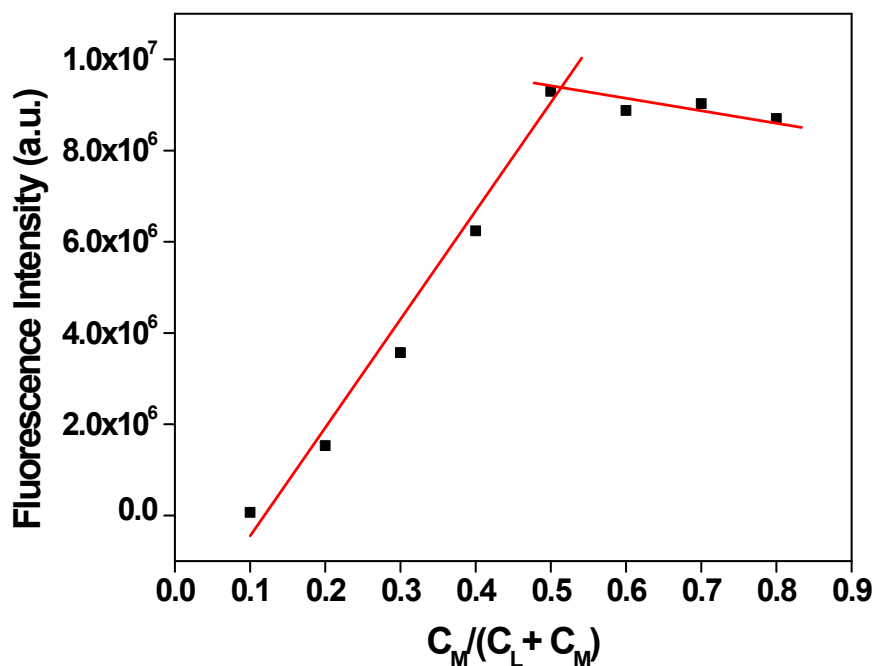

**Fig. s7:** Job's plot analysis of HL-Me shows formation of 1:1 complex with  $Al^{3+}$

#### **Determination of LOD of HL-Me:**

Limit of detection (LOD) for our probe has been determined by  $3\sigma$  method by the following equation:  $DL = K * Sb1/S$

where  $K = 2$  or  $3$  ( $3$  in this case); here  $Sb1$  is the standard deviation of the blank solution (Fig. s8); and  $S$  is the slope of the calibration curve obtained from Linear dynamic plot of F.I. vs  $[Al^{3+}]$  M (Fig. s9).

Here  $Sb1 = 331.61298$ ,  $S = 3.47518 \times 10^{11}$

$LOD (Al^{3+}) = (3 \times 331.61298) / (3.47518 \times 10^{11}) = 2.8627 \text{ nM}$

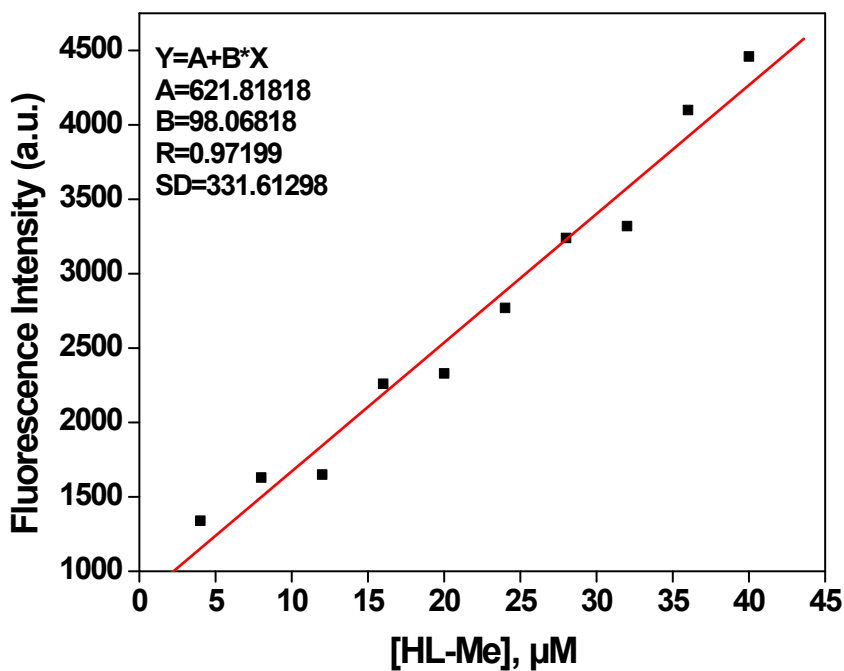

Fig. s8: Determination of  $Sb1$  of the blank, HL-Me solution.

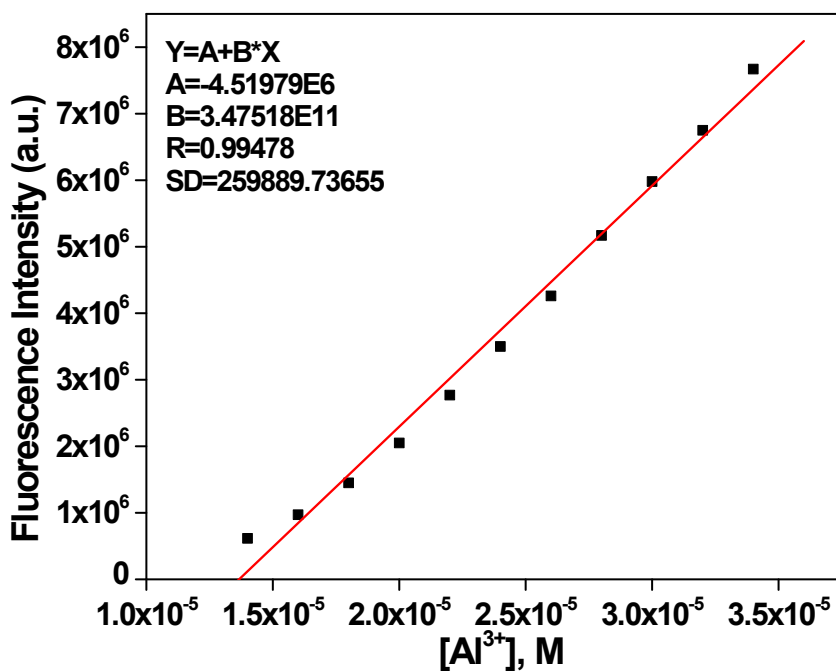

Fig. s9: Linear dynamic plot of F.I. (at 552 nm) vs.  $[\text{Al}^{3+}]$  for the determination of  $S$  (slope);  $[\text{HL-Me}] = 40 \mu\text{M}$

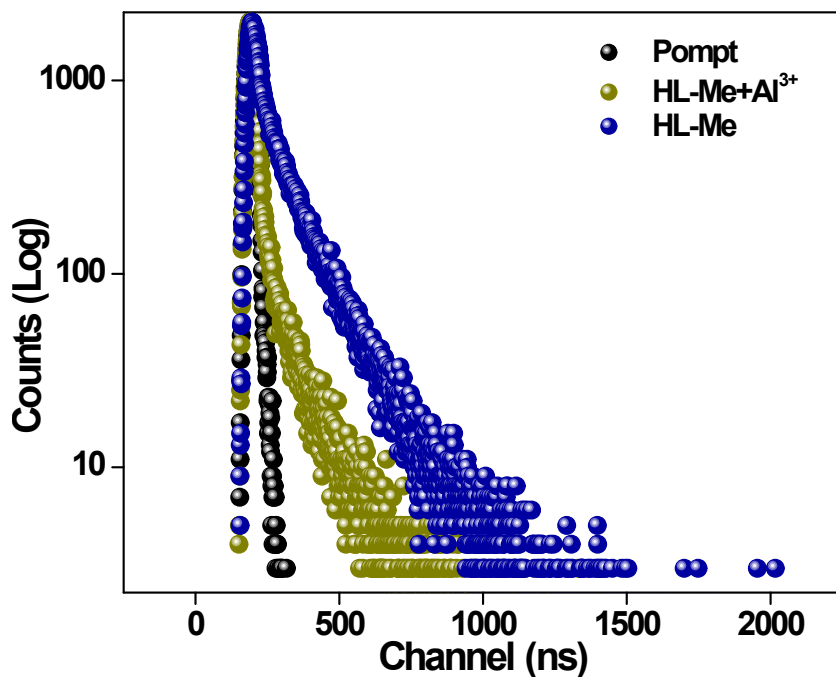

**Fig. s10:** Excited state fluorescence decay behavior of HL-Me and its complex with Al<sup>3+</sup> ion in 10 mM HEPES buffer at pH 7.4 in H<sub>2</sub>O:MeOH (1:9, v/v) at room temperature.

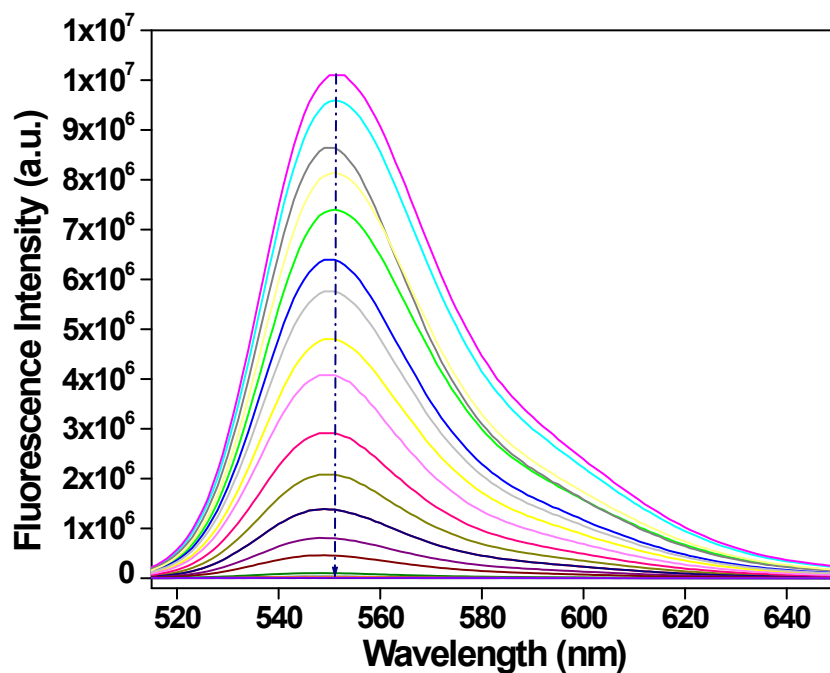

**Fig. s11:** Fluorescence spectra of Al-L-Me complex (40 μM) upon addition of (0-44 μM) AsO<sub>4</sub><sup>3-</sup> ion in 10 mM HEPES buffer at pH 7.4 in H<sub>2</sub>O/MeOH =1:9 (v/v) at 25 °C.

**Table s1:** Crystal data of HL-Me

|                                          |                                                               |
|------------------------------------------|---------------------------------------------------------------|
| Formula                                  | C <sub>36</sub> H <sub>38</sub> N <sub>4</sub> O <sub>3</sub> |
| formula weight                           | 574.70                                                        |
| crystal system                           | monoclinic                                                    |
| space group                              | P21/n                                                         |
| a/Å                                      | 12.7536(5)                                                    |
| b/Å                                      | 16.6911(6)                                                    |
| c/Å                                      | 14.2331(5)                                                    |
| α/°                                      | 90.00                                                         |
| β/°                                      | 95.369(2)                                                     |
| γ/°                                      | 90.00                                                         |
| V/Å <sup>3</sup>                         | 3016.53(19)                                                   |
| Z                                        | 4                                                             |
| Dc/g cm <sup>-3</sup>                    | 1.265                                                         |
| μ/mm <sup>-1</sup>                       | 0.081                                                         |
| F(000)                                   | 1224                                                          |
| θ range/°                                | 1.9-28.1                                                      |
| reflections collected                    | 27355                                                         |
| unique reflections                       | 7301                                                          |
| reflections I > 2σ(I)                    | 4613                                                          |
| R <sub>int</sub>                         | 0.031                                                         |
| goodness-of-fit (F2)                     | 0.94                                                          |
| R <sub>1</sub> (I > 2σ(I)) <sup>a</sup>  | 0.0475                                                        |
| wR <sub>2</sub> (I > 2σ(I)) <sup>a</sup> | 0.1529                                                        |
| Δρ max/min/e Å <sup>3</sup>              | -0.21, 0.16                                                   |



**Table s2:** Selected bond lengths (in Å) and selected bond angles (°) of HL-Me

---

|            |          |            |          |
|------------|----------|------------|----------|
| N3-C21     | 1.447(2) | O3-C29     | 1.351(2) |
| N3-C20     | 1.366(2) | C19-C20    | 1.479(2) |
| N3-C13     | 1.504(2) | C21-C22    | 1.519(2) |
| N4-C23     | 1.271(2) | C13-C14    | 1.522(2) |
| N4-C22     | 1.450(2) | C14-C19    | 1.381(2) |
| O2-C20     | 1.224(2) | C24-C29    | 1.397(2) |
| C22-N4-C23 | 119.0(1) | N4-C22-C21 | 110.3(1) |
| C20-N3-C21 | 123.1(1) | N4-C23-C24 | 122.1(2) |
| C21-N3-C13 | 122.3(1) | O2-C20-N3  | 125.6(1) |
| C13-N3-O20 | 113.7(1) | O3-C29-C24 | 122.2(2) |

---
